# Supplementary material for: Relationship between School Backpacks and Musculoskeletal Pain in Children 8 to 10 Years of Age: An Observational, Cross-Sectional and Analytical Study
Source: MDPI journal article supplement (doi:10.3390/ijerph17072487), 2020-04-05
Supplement: s1 [file s1]

## Supplementary File S1

### *Data sheet of the participants*

#### *Part 1: Personal information*

ID: CHIPAIN\_

Student weight:

Gender:

Student size:

- ☐ Boy
- ☐ Girl

BMI:

Birth date:

Backpack weight:

Disorders associated with the spine:

School year:

#### *Part 2: Related to the use of the backpack*

##### **1. How do you go to school?**

- ☐ Transportation
- ☐ Walk

##### **2. If you walk, how long does it take to get from home to school?**

- ☐ <5 min
- ☐ 5-10 min
- ☐ 11-15 min
- ☐ 16-20 min
- ☐ 21-30 min
- ☐ >30 min

##### **3. Do you carry your own backpack?**

- ☐ Yes
- ☐ No

##### **4. How do you normally carry the backpack?**

- ☐ On both shoulders
- ☐ On one shoulder
- ☐ In my hand

##### **5. Do you feel tired carrying your backpack?**

- ☐ Never
- ☐ Almost never
- ☐ Sometimes

- ☐ Frequently
- ☐ Always

**6. Do you think your backpack is too heavy for you?**

- ☐ Yes
- ☐ No

**7. When you arrive at school, do you leave the material that you bring in your backpack in the spaces dedicated to it?**

- ☐ Yes
- ☐ No

**8. Do your parents experience back pain?**

- ☐ Yes
- ☐ No

**9. How many hours do you spend watching TV or playing video games during the day?**

- ☐ 0
- ☐ 1
- ☐ 2
- ☐ 3
- ☐ 4
- ☐ >5

**10. What physical activities do you do?**

- ☐ Physical education classes
- ☐ Other sports:

**11. How many hours do you dedicate to extracurricular sports activities on a weekly basis?**

- ☐ 0
- ☐ 1
- ☐ 2
- ☐ 3
- ☐ 4
- ☐ >5

If your back hurts and you have not had any injuries that cause this pain, please answer the following questions:

**12. How often does your back hurt?**

- ☐ Frequently (4-5 days/week or more)
- ☐ Sometimes (2-3 days/week)
- ☐ Occasionally (1day/week)
- ☐ Rarely (<1 day/week)

**13. How long has it been hurting?**

- ☐ <1 month
- ☐ 1-3 months
- ☐ 3-6 months
- ☐ 6 or more

**14. How long does the back pain last?**

- ☐ Less than 2 hours
- ☐ between 2 and 12 hours
- ☐ more than 12 hour

**15. Have you missed school, other classes or sports because of pain?**

- ☐ Yes
- ☐ No

**16. Have you been to the doctor for this pain?**

- ☐ Yes
- ☐ No

**17. The pain gets worse if:**

- ☐ You carry your backpack
- ☐ You lift the backpack
- ☐ You run
- ☐ It does not get wors
